# Supplementary material for: Polydopamine-modified chitin conduits with sustained release of bioactive peptides enhance peripheral nerve regeneration in rats
Source: PubMed Central journal article supplement — Neural Regen Res. 2022 Apr 1;17(11):2544–50. doi: 10.4103/1673-5374.339006 (PMC9120711; doi:10.4103/1673-5374.339006), 2022-04-01
Supplement: NRR-17-2544_Suppl1.pdf [file NRR-17-2544_Suppl1.pdf]

## Identification of human umbilical vein endothelial cells

### Materials and Methods

#### Identification of human umbilical vein endothelial cells

For the identification of human umbilical vein endothelial cells (HUVECs), the HUVECs were gently rinsed with 37°C phosphate buffered saline (PBS) and fixed them with 4% paraformaldehyde for 15 minutes. Cells samples were permeabilize by 0.5% Triton X-100 (Sigma-Aldrich) at room temperature for 5 minutes. Then the HUVECs samples were incubated with rabbit anti-CD31 antibody (1:50, Cat# ab281583, Abcam) overnight at 4°C. Goat anti-rabbit secondary antibody (1:200, RRID:AB\_2650602, Cat# ab150080, Abcam) were then incubated with the HUVECs samples in the dark for 2 hours at room temperature. The samples were softly washed by PBS and incubated with and 4',6-diamidino-2-phenylindole dihydrochloride (DAPI, 1:1000; Sigma-Aldrich) at room temperature for 30 minutes. After that, a fluorescence microscope (Leica) was used to image the cells samples.

### Results

As shown in the **Figure 1**, the coincidence rate of CD31 and DAPI was 100%, so it could be considered that the purity of HUVECs meets the experimental requirements.

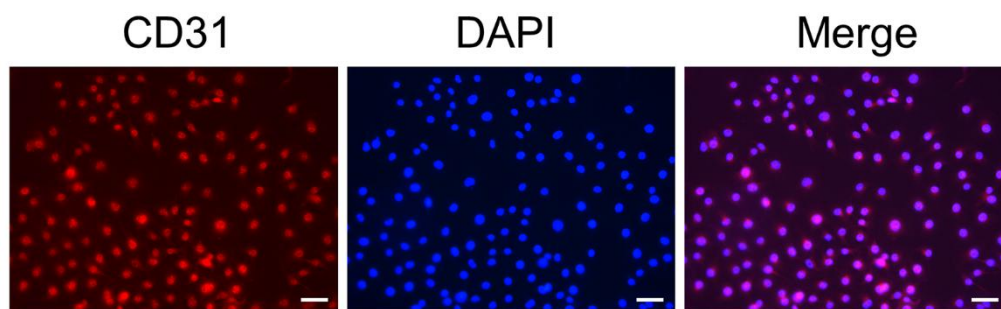

**Figure 1 Identification of HUVECs**

HUVECs (marked by CD31, red, Alexa Fluor 594)/ nucleus (blue, DAPI) staining. The coincidence rate of CD31 and DAPI was 100%. Scale bars: 50  $\mu\text{m}$ . DAPI: 4',6-Diamidino-2-phenylindole dihydrochloride; HUVECs: human umbilical vein endothelial cells.
